# Supplementary material for: P2Y2R Deficiency Ameliorates Hepatic Steatosis by Reducing Lipogenesis and Enhancing Fatty Acid β-Oxidation through AMPK and PGC-1α Induction in High-Fat Diet-Fed Mice
Source: MDPI journal article supplement (doi:10.3390/ijms22115528), 2021-05-24
Supplement: s1 [file s1]

# Supplementary Figure S1

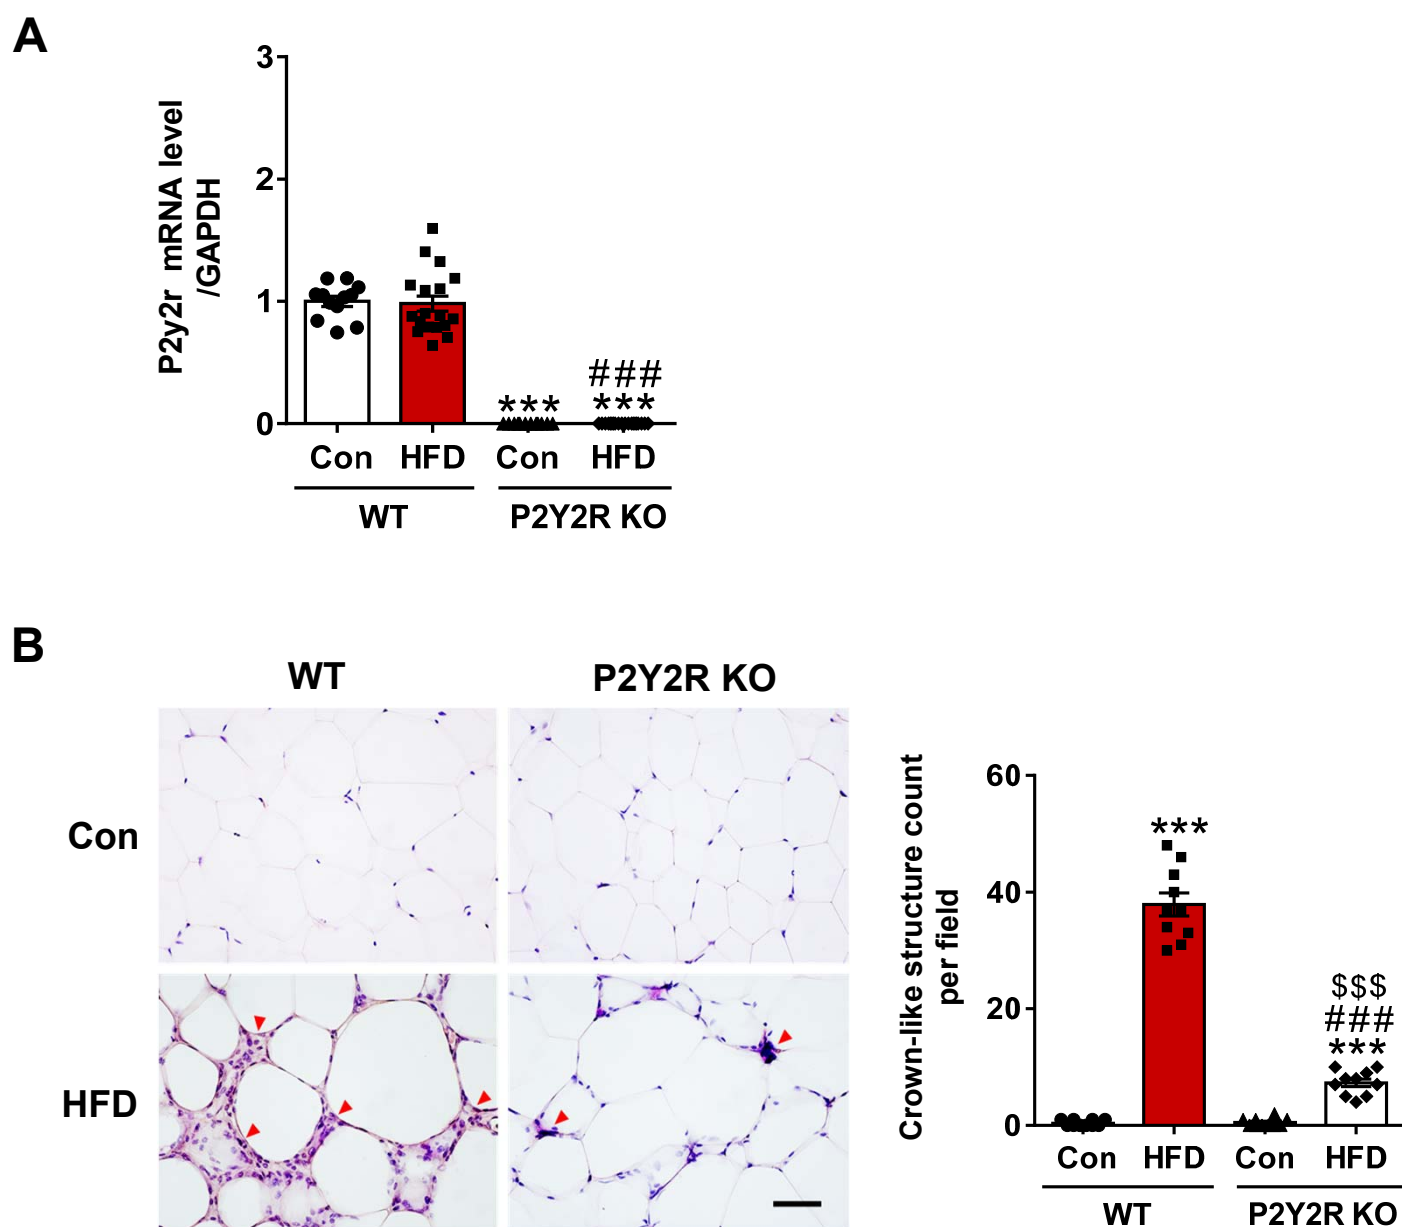

**Figure S1.** Hepatic P2Y2R mRNA expression and histological analysis of adipose tissue. (A) Relative mRNA expression of hepatic P2Y2R in WT and KO mice fed with NCD or HFD for 12 weeks; the mRNA levels were normalized to those of GAPDH (n = 3-5). (B) Representative images of white adipose tissue sections were presented after H&E staining from WT and KO mice fed with NCD or HFD for 12 weeks (n = 3). Red arrow heads indicate crown-like structures (CLS) formed in adipose tissue. Data are presented as the mean  $\pm$  SEM. One-way ANOVA was used for statistical analysis followed by Bonferroni's multiple comparison test. \*\*\*p < 0.001 vs WT control mice; and ###p < 0.001 vs WT HFD mice; \$\$\$p < 0.001 vs KO control mice. Scale bar, 50  $\mu$ m.
